# Supplementary material for: Structural studies in aqueous solution of new binuclear lanthanide luminescent peptide conjugates
Source: Royal Society of Chemistry journal article supplement (doi:10.1039/b811388b), 2008-01-01

# Novel binuclear lanthanide luminescent peptide conjugates: Structural analysis in aqueous solution of potential metallo enzymatic mimics

Célia S. Bonnet, Marc Devocelle and Thorfinnur Gunnlaugsson\*

## Electronic Supplementary Information

**Figure 1.** ES MS spectrum of **1**

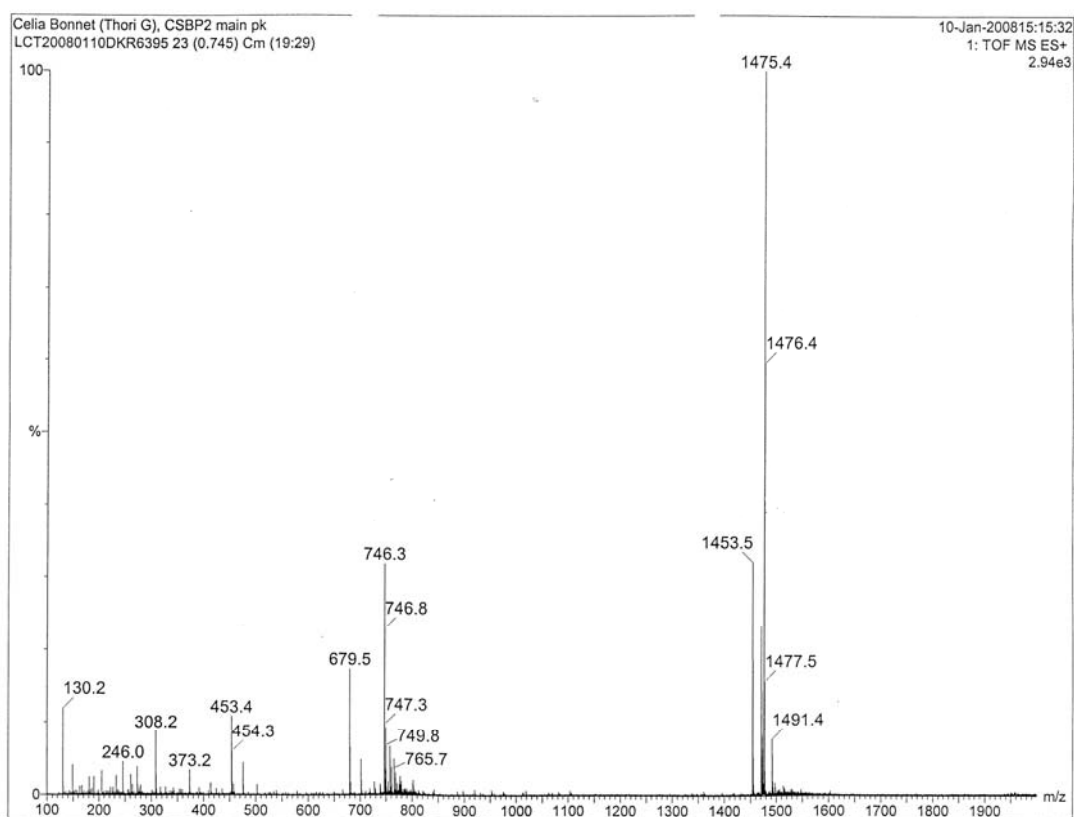

**Figure 2.** Maldi-Tof spectrum of **2**

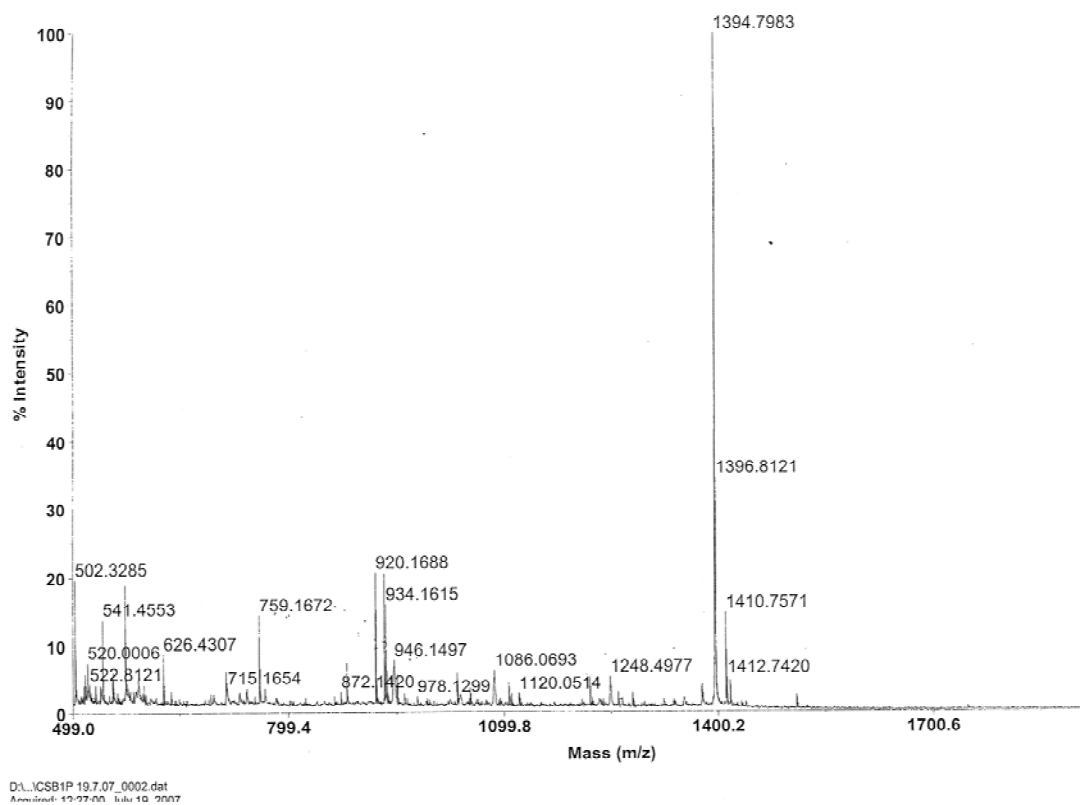

**Figure 3.**  $^1\text{H}$  NMR spectrum (600 MHz) of **1** in a mixture 9:1  $\text{H}_2\text{O}:\text{D}_2\text{O}$

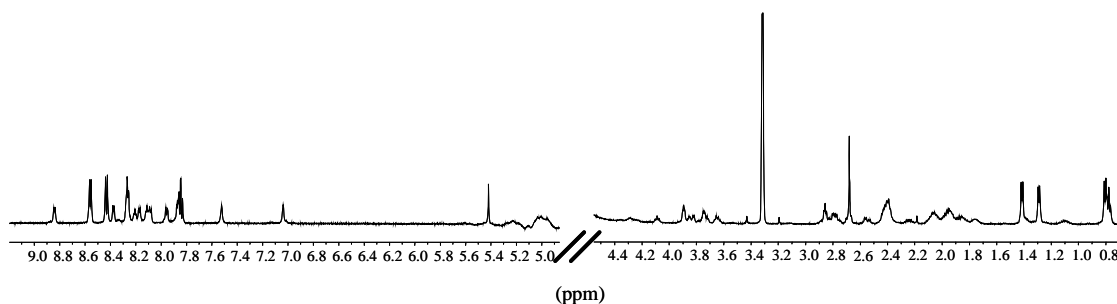

**Figure 4.** Speciation distribution obtained at pH 7, with  $[\mathbf{2}] = 35 \mu\text{M}$  and with the following conditional stability constant :  $\log \beta_{11} = 6.8$ ,  $\log \beta_{21} = 11.9$ . It should be noted that when  $[\text{M}] = 0.8 \cdot [\mathbf{2}]$  (conditions used for the measurements of q-value), no free metal is present and less than 5% of binuclear complex is in solution.

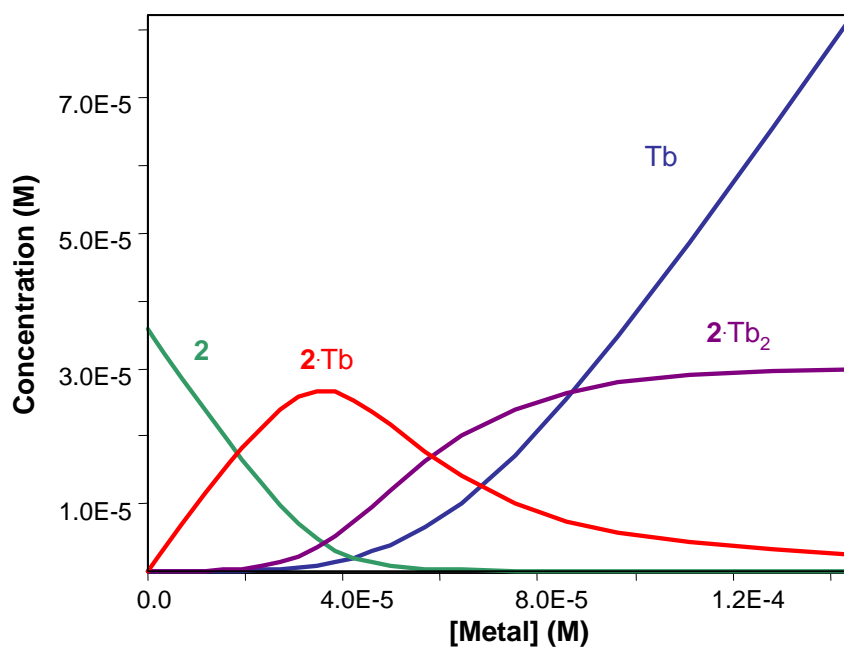

**Figure 5.** Luminescent decay rates of a  $\text{Tb}^{3+}$  bound to **2** with increasing  $\text{H}_2\text{O}$  concentration.  $[\text{Tb}^{3+}] = 0.8*[\text{P}] = 13.5 \text{ mM}$ ,  $\text{pH} = 7.0$ ,  $[\text{HEPES}] = 10 \text{ mM}$ ,  $[\text{NaCl}] = 0.1 \text{ M}$ . The excitation wavelength was 280 nm, and  $\text{Tb}^{3+}$  sensitized emission was recorded at 545 nm. Same results are obtained by direct excitation on the metal at 368 nm. Extrapolation to an  $\text{H}_2\text{O}$ -free solution provides the rate constant in  $\text{D}_2\text{O}$ .

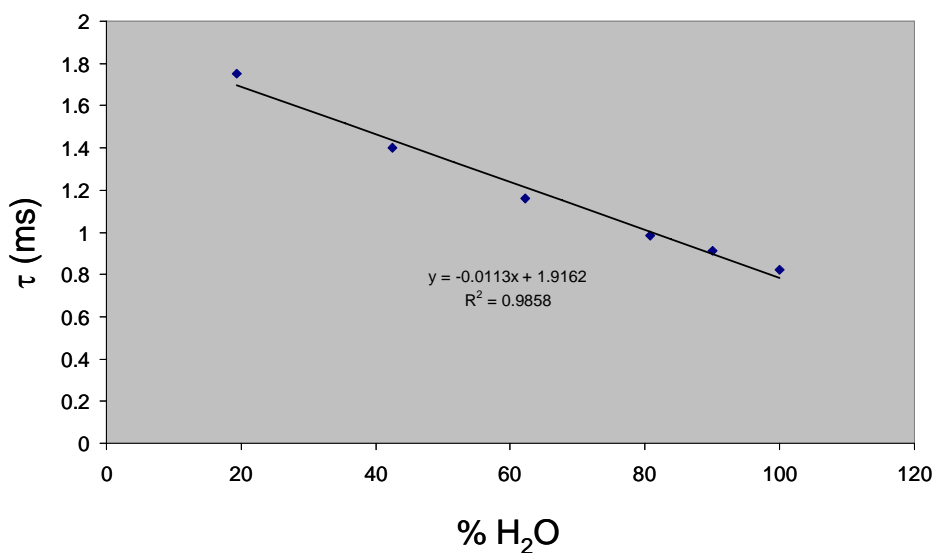

**Figure 6.** Luminescent decay rates of a  $\text{Eu}^{3+}$  bound to **2** with increasing  $\text{H}_2\text{O}$  concentration.  $[\text{Eu}^{3+}] = 0.8*[\text{P}] = 15.5 \text{ mM}$ ,  $\text{pH} = 7.0$ ,  $[\text{HEPES}] = 10 \text{ mM}$ ,  $[\text{NaCl}] = 0.1 \text{ M}$ . The excitation wavelength was 344 nm, and  $\text{Eu}^{3+}$  sensitized emission was recorded at 616 nm. Extrapolation to an  $\text{H}_2\text{O}$ -free solution provides the rate constant in  $\text{D}_2\text{O}$ .

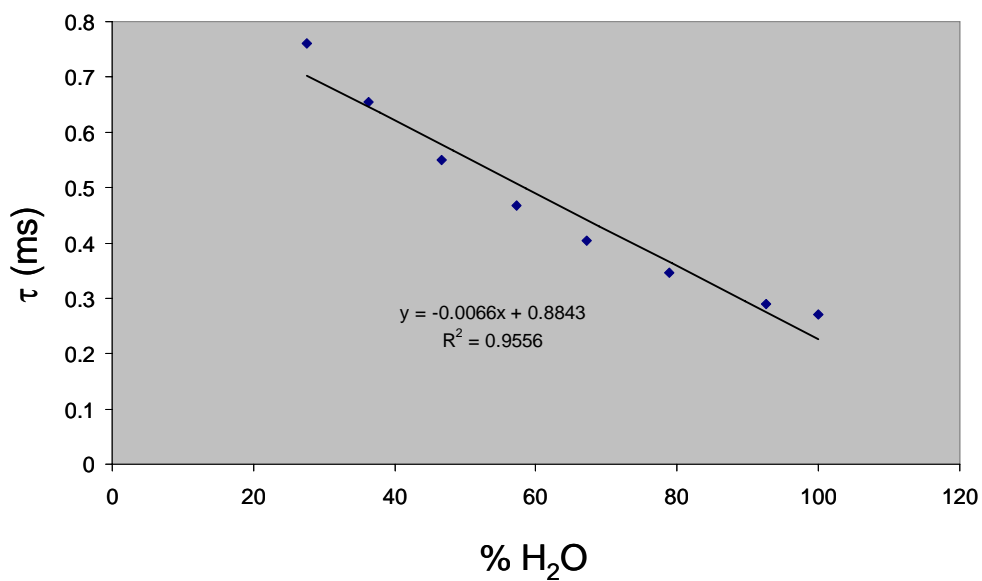

**Figure 7.**  $^1\text{H}$  NMR spectra (600 MHz) of **2**, **2** basified by NaOH and the corresponding Eu(III) complexes in a mixture 9:1  $\text{H}_2\text{O}:\text{D}_2\text{O}$

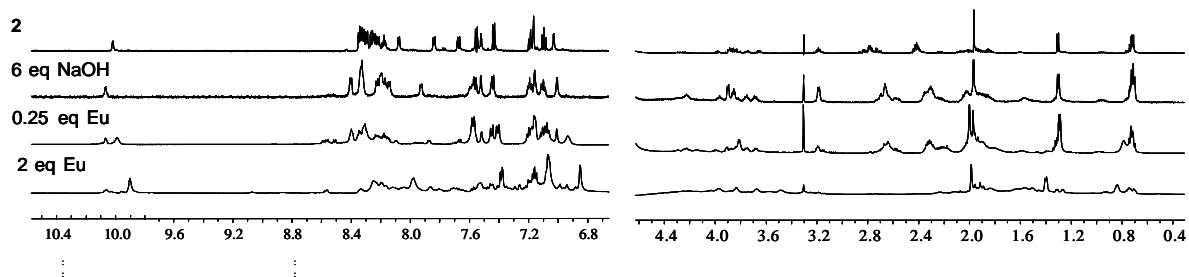

**Figure 8.** CD-Spectra of **2** (shown as P1) and the changes observed upon addition of one and two equivalents of Tb(III).

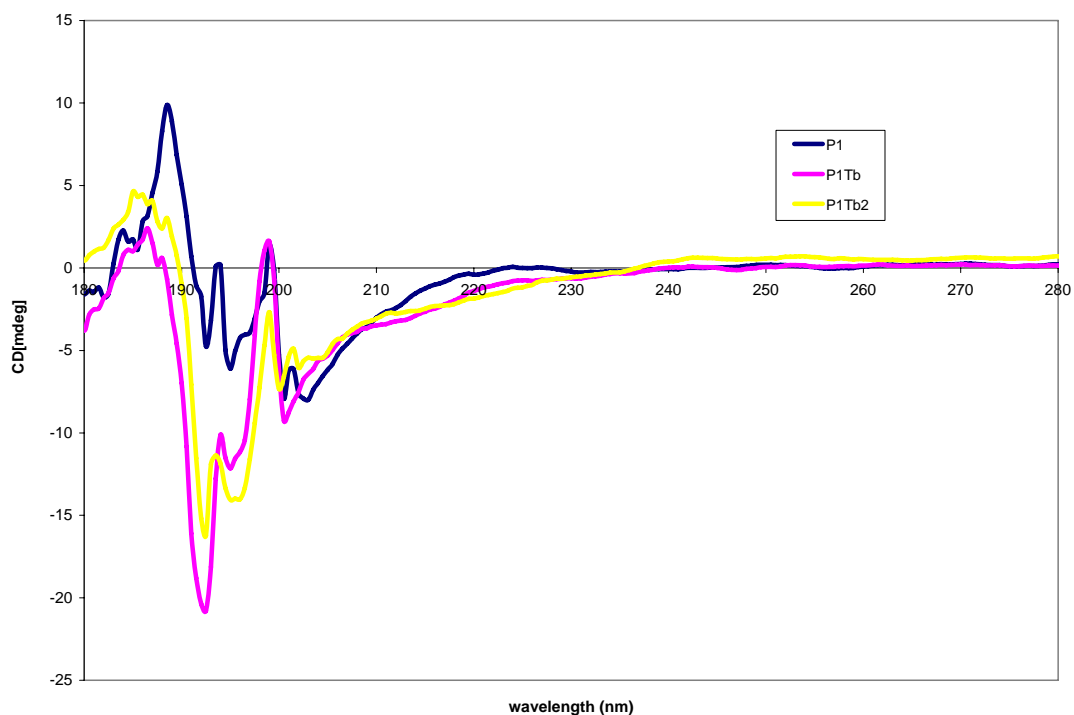

**Figure 9.** Schematic representation of the mono and di-nuclear complexes of **2**.

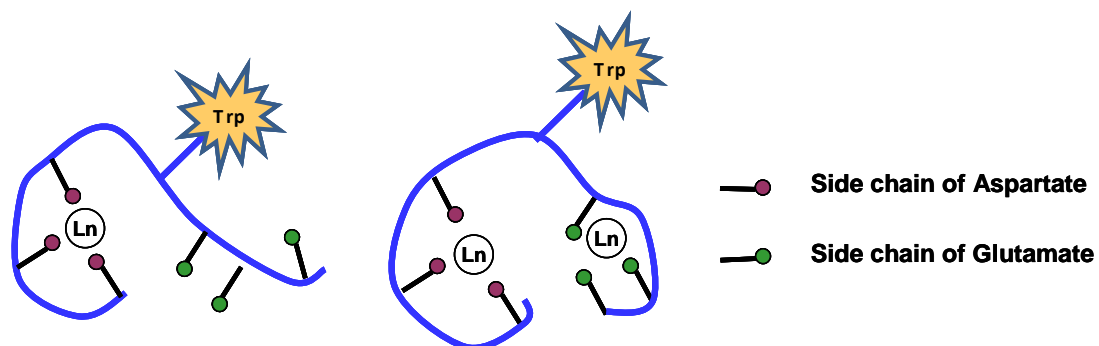

Supplement: b811388b.pdf [file b811388b.pdf]
